# Supplementary material for: Clinical and Epidemiological Characteristics of COVID-19 Patients with SARS-CoV-2 Re-Detected on PCR Test after Discharge from Isolation
Source: MDPI journal article supplement (doi:10.3390/clinpract11040110), 2021-12-18
Supplement: s1 [file s1]

**Table S1.** SARS-CoV-2 PCR test results by participant and date (N = 22).

| Case ID | Symptoms | Result          | Date      | Interval (days) <sup>a</sup> | Case ID | Symptoms | Result | Date      | Interval (days) <sup>a</sup> |
|---------|----------|-----------------|-----------|------------------------------|---------|----------|--------|-----------|------------------------------|
| 1       | Yes      | +1 <sup>b</sup> | 1-May-20  | 44                           | 9       | Yes      | 1      | 1-May-20  | 12                           |
| 1       | No       | –               | 10-May-20 |                              | 9       | No       | –      | 9-May-20  |                              |
| 1       | No       | –               | 14-May-20 |                              | 9       | No       | –      | 12-May-20 |                              |
| 1       | Yes      | +2 <sup>d</sup> | 23-Jun-20 |                              | 9       | Yes      | 2      | 21-May-20 |                              |
| 2       | Yes      | 1               | 6-Apr-20  | 9                            | 9       | Yes      | 2      | 1-Jun-20  |                              |
| 2       | Yes      | 1               | 13-Apr-20 |                              | 10      | Yes      | 1      | 20-Mar-20 | 23                           |
| 2       | No       | –               | 18-Apr-20 |                              | 10      | No       | –      | 24-Mar-20 |                              |
| 2       | No       | –               | 20-Apr-20 |                              | 10      | No       | –      | 29-Mar-20 |                              |
| 2       | Yes      | 2               | 27-Apr-20 |                              | 10      | Yes      | 2      | 16-Apr-20 |                              |
| 3       | Yes      | 1               | 12-Mar-20 | 4                            | 11      | Yes      | 1      | 7-Apr-20  | 9                            |
| 3       | No       | 1               | 17-Mar-20 |                              | 11      | Yes      | 1      | 13-Apr-20 |                              |
| 3       | No       | –               | 19-Mar-20 |                              | 11      | No       | –      | 18-Apr-20 |                              |
| 3       | No       | –               | 21-Mar-20 |                              | 11      | No       | –      | 20-Apr-20 |                              |
| 3       | No       | 2               | 23-Mar-20 |                              | 11      | Yes      | 2      | 27-Apr-20 |                              |
| 4       | Yes      | 1               | 3-Apr-20  | 9                            | 12      | Yes      | 1      | 16-Apr-20 | 8                            |
| 4       | Yes      | 1               | 6-Apr-20  |                              | 12      | No       | 1      | 26-Apr-20 |                              |
| 4       | Yes      | 1               | 8-Apr-20  |                              | 12      | No       | –      | 30-Apr-20 |                              |
| 4       | No       | 1               | 13-Apr-20 |                              | 12      | No       | –      | 4-May-20  |                              |
| 4       | No       | –               | 18-Apr-20 |                              | 12      | Yes      | 2      | 8-May-20  |                              |
| 4       | No       | –               | 20-Apr-20 |                              | 12      | Yes      | –      | 12-May-20 |                              |
| 4       | No       | 2               | 27-Apr-20 |                              | 12      | No       | 2      | 16-May-20 |                              |
| 5       | Yes      | 1               | 6-Apr-20  | 14                           | 13      | Yes      | 1      | 4-May-20  | 4                            |
| 5       | Yes      | –               | 13-Apr-20 |                              | 13      | No       | –      | 12-May-20 |                              |
| 5       | No       | –               | 18-Apr-20 |                              | 13      | No       | –      | 13-May-20 |                              |
| 5       | No       | –               | 20-Apr-20 |                              | 13      | No       | 2      | 16-May-20 |                              |
| 5       | No       | 2               | 27-Apr-20 |                              | 14      | Yes      | 1      | 26-Mar-20 | 8                            |
| 6       | Yes      | 1               | 27-Mar-20 | 6                            | 14      | No       | –      | 2-Apr-20  |                              |
| 6       | Yes      | 1               | 28-Mar-20 |                              | 14      | No       | 1      | 5-Apr-20  |                              |
| 6       | Yes      | 1               | 8-Apr-20  |                              | 14      | No       | –      | 9-Apr-20  |                              |
| 6       | No       | –               | 14-Apr-20 |                              | 14      | No       | –      | 13-Apr-20 |                              |
| 6       | No       | –               | 17-Apr-20 |                              | 14      | No       | 2      | 17-Apr-20 |                              |
| 6       | No       | 2               | 20-Apr-20 |                              | 15      | Yes      | 1      | 27-Mar-20 | 7                            |
| 7       | Yes      | 1               | 6-Apr-20  | 14                           | 15      | Yes      | 1      | 31-Mar-20 |                              |
| 7       | Yes      | –               | 13-Apr-20 |                              | 15      | No       | –      | 6-Apr-20  |                              |
| 7       | No       | –               | 18-Apr-20 |                              | 15      | No       | –      | 9-Apr-20  |                              |
| 7       | No       | –               | 20-Apr-20 |                              | 15      | No       | 2      | 13-Apr-20 |                              |
| 7       | No       | 2               | 27-Apr-20 |                              | 16      | Yes      | 1      | 3-Apr-20  | 11                           |
| 8       | Yes      | 1               | 7-Apr-20  | 9                            | 16      | Yes      | 1      | 7-Apr-20  |                              |
| 8       | No       | 1               | 13-Apr-20 |                              | 16      | No       | –      | 11-Apr-20 |                              |
| 8       | No       | –               | 18-Apr-20 |                              | 16      | No       | –      | 15-Apr-20 |                              |
| 8       | No       | –               | 20-Apr-20 |                              | 16      | No       | 2      | 22-Apr-20 |                              |
| 8       | No       | 2               | 27-Apr-20 |                              | 20      | Yes      | 1      | 8-May-20  | 41                           |
| 17      | Yes      | +1 <sup>b</sup> | 24-Mar-20 | 14                           | 20      | No       | –      | 19-May-20 |                              |
| 17      | Yes      | 1               | 1-Apr-20  |                              | 20      | No       | –      | 21-May-20 |                              |
| 17      | No       | –               | 7-Apr-20  |                              | 20      | No       | –      | 26-Jun-20 |                              |
| 17      | No       | –               | 12-Apr-20 |                              | 20      | Yes      | 2      | 29-Jun-20 |                              |

|    |     |                 |           |     |    |     |   |           |     |
|----|-----|-----------------|-----------|-----|----|-----|---|-----------|-----|
| 17 | No  | +2 <sup>d</sup> | 21-Apr-20 |     | 20 | No  | 2 | 8-Jul-20  |     |
| 17 | No  | 2               | 25-Apr-20 |     | 21 | Yes | 1 | 23-Apr-20 | 25  |
| 18 | Yes | 1               | 5-Apr-20  | 105 | 21 | No  | – | 2-May-20  |     |
| 18 | No  | –               | 11-Apr-20 |     | 21 | No  | – | 4-May-20  |     |
| 18 | No  | –               | 15-Apr-20 |     | 21 | Yes | 2 | 27-May-20 |     |
| 18 | Yes | 2               | 24-Jul-20 |     | 22 | Yes | 1 | 6-Apr-20  | 117 |
| 18 | No  | 2               | 31-Jul-20 |     | 22 | Yes | 1 | 13-Apr-20 |     |
| 19 | Yes | 1               | 22-Apr-20 | 30  | 22 | No  | – | 18-Apr-20 |     |
| 19 | Yes | –               | 23-Apr-20 |     | 22 | No  | – | 20-Apr-20 |     |
| 19 | No  | –               | 7-May-20  |     | 22 | No  | – | 9-Jun-20  |     |
| 19 | Yes | 2               | 23-May-20 |     | 22 | Yes | 2 | 13-Aug-20 |     |
| 19 | No  | 2               | 8-Jun-20  |     |    |     |   |           |     |
| 19 | No  | 2               | 15-Jun-20 |     |    |     |   |           |     |

<sup>a</sup> Interval period in days between first negative results in the first episode and first repeat-positive results in the second episode with period more than 2 days. <sup>b</sup>: Positive results of the first episode; –: Negative laboratory results; <sup>d</sup>: Positive results after negative one with period more than 2 days.
